# Supplementary material for: Assessing the Impact of Granular Privacy Controls on Content Sharing and Disclosure on Facebook
Source: Atypon-hosted journal article supplement (doi:10.1287/isre.2016.0672), 2016-11-04
Supplement: isre.2016.0672-sm.pdf [file isre.2016.0672-sm.pdf]

|                 | <i>Message</i> | <i>Post</i> | <i>Privacy</i> | <i>FAge</i> | <i>February</i> | <i>March</i> | <i>April</i> | <i>May</i> | <i>June</i> | <i>July</i> | <i>August</i> | <i>Sept.</i> | <i>October</i> | <i>Novem.</i> | <i>Decem.</i> | <i>Female</i> | <i>Male</i> |
|-----------------|----------------|-------------|----------------|-------------|-----------------|--------------|--------------|------------|-------------|-------------|---------------|--------------|----------------|---------------|---------------|---------------|-------------|
| <i>Message</i>  | 1.0000         |             |                |             |                 |              |              |            |             |             |               |              |                |               |               |               |             |
| <i>Post</i>     | 0.5451         | 1.0000      |                |             |                 |              |              |            |             |             |               |              |                |               |               |               |             |
| <i>Privacy</i>  | -0.0230        | -0.0351     | 1.0000         |             |                 |              |              |            |             |             |               |              |                |               |               |               |             |
| <i>FAge</i>     | 0.1600         | 0.1762      | 0.1705         | 1.0000      |                 |              |              |            |             |             |               |              |                |               |               |               |             |
| <i>February</i> | 0.0130         | 0.0135      | -0.0551        | -0.0456     | 1.0000          |              |              |            |             |             |               |              |                |               |               |               |             |
| <i>March</i>    | 0.0091         | 0.0100      | -0.0622        | -0.0317     | -0.0767         | 1.0000       |              |            |             |             |               |              |                |               |               |               |             |
| <i>April</i>    | 0.0140         | 0.0033      | -0.0553        | -0.0118     | -0.0682         | -0.0769      | 1.0000       |            |             |             |               |              |                |               |               |               |             |
| <i>May</i>      | -0.0011        | -0.0077     | -0.0567        | -0.0145     | -0.0699         | -0.0789      | -0.0701      | 1.0000     |             |             |               |              |                |               |               |               |             |
| <i>June</i>     | -0.0151        | -0.0167     | -0.0641        | 0.0021      | -0.0791         | -0.0892      | -0.0793      | -0.0813    | 1.0000      |             |               |              |                |               |               |               |             |
| <i>July</i>     | -0.0134        | -0.0181     | -0.0569        | 0.0194      | -0.0702         | -0.0792      | -0.0704      | -0.0721    | -0.0816     | 1.0000      |               |              |                |               |               |               |             |
| <i>August</i>   | -0.0001        | -0.0186     | -0.0608        | 0.0508      | -0.0749         | -0.0845      | -0.0751      | -0.0770    | -0.0871     | -0.0773     | 1.0000        |              |                |               |               |               |             |
| <i>Sept.</i>    | 0.0068         | 0.0202      | -0.0680        | 0.0216      | -0.0839         | -0.0946      | -0.0841      | -0.0862    | -0.0976     | -0.0866     | -0.0924       | 1.0000       |                |               |               |               |             |
| <i>October</i>  | -0.0052        | 0.0065      | -0.0720        | -0.0306     | -0.0888         | -0.1002      | -0.0891      | -0.0913    | -0.1033     | -0.0917     | -0.0978       | -0.1096      | 1.0000         |               |               |               |             |
| <i>Novem.</i>   | -0.0035        | -0.0025     | -0.0728        | 0.0255      | -0.0897         | -0.1012      | -0.0899      | -0.0922    | -0.1043     | -0.0926     | -0.0988       | -0.1106      | -0.1172        | 1.0000        |               |               |             |
| <i>Decem.</i>   | 0.0024         | 0.0062      | 0.3245         | 0.0100      | -0.0933         | -0.1052      | -0.0935      | -0.0959    | -0.1085     | -0.0963     | -0.1028       | -0.1151      | -0.1218        | -0.1230       | 1.0000        |               |             |
| <i>Female</i>   | 0.2484         | 0.3382      | -0.0002        | 0.3021      | 0.0007          | 0.0007       | 0.0004       | -0.0070    | -0.0062     | -0.0049     | -0.0042       | 0.0207       | -0.0023        | -0.0007       | 0.0003        | 1.0000        |             |
| <i>Male</i>     | 0.1501         | 0.1609      | -0.0050        | 0.3073      | 0.0015          | 0.0019       | 0.0017       | -0.0051    | -0.0062     | -0.0054     | -0.0059       | 0.0212       | -0.0007        | -0.0024       | -0.0016       | -0.3899       | 1.0000      |

**Table S1.** Correlation Coefficients Matrix for the Short-Run Dataset

|                 | <i>Message</i> | <i>Post</i> | <i>Privacy</i> | <i>FAge</i> | <i>February</i> | <i>March</i> | <i>April</i> | <i>May</i> | <i>June</i> | <i>July</i> | <i>August</i> | <i>Sept.</i> | <i>October</i> | <i>Novem.</i> | <i>Decem.</i> | <i>Female</i> | <i>Male</i> |
|-----------------|----------------|-------------|----------------|-------------|-----------------|--------------|--------------|------------|-------------|-------------|---------------|--------------|----------------|---------------|---------------|---------------|-------------|
| <i>Message</i>  | 1.0000         |             |                |             |                 |              |              |            |             |             |               |              |                |               |               |               |             |
| <i>Post</i>     | 0.5137         | 1.0000      |                |             |                 |              |              |            |             |             |               |              |                |               |               |               |             |
| <i>Privacy</i>  | -0.0814        | -0.1226     | 1.0000         |             |                 |              |              |            |             |             |               |              |                |               |               |               |             |
| <i>FAge</i>     | 0.0900         | 0.0841      | 0.3672         | 1.0000      |                 |              |              |            |             |             |               |              |                |               |               |               |             |
| <i>February</i> | 0.0005         | -0.0004     | 0.0762         | 0.0219      | 1.0000          |              |              |            |             |             |               |              |                |               |               |               |             |
| <i>March</i>    | -0.0122        | -0.0083     | 0.0655         | 0.0253      | -0.1001         | 1.0000       |              |            |             |             |               |              |                |               |               |               |             |
| <i>April</i>    | -0.0045        | -0.0136     | 0.0754         | 0.0544      | -0.0913         | -0.1002      | 1.0000       |            |             |             |               |              |                |               |               |               |             |
| <i>May</i>      | 0.0085         | -0.0180     | 0.0691         | 0.0448      | -0.0924         | -0.1015      | -0.0925      | 1.0000     |             |             |               |              |                |               |               |               |             |
| <i>June</i>     | -0.0080        | -0.0096     | -0.0617        | -0.0390     | -0.0859         | -0.0943      | -0.0860      | -0.0871    | 1.0000      |             |               |              |                |               |               |               |             |
| <i>July</i>     | -0.0033        | -0.0030     | -0.0938        | -0.0401     | -0.0718         | -0.0788      | -0.0719      | -0.0728    | -0.0677     | 1.0000      |               |              |                |               |               |               |             |
| <i>August</i>   | 0.0007         | -0.0095     | -0.0207        | 0.0181      | -0.0861         | -0.0946      | -0.0862      | -0.0873    | -0.0812     | -0.0678     | 1.0000        |              |                |               |               |               |             |
| <i>Sept.</i>    | 0.0107         | 0.0254      | -0.0774        | -0.0227     | -0.0896         | -0.0984      | -0.0897      | -0.0908    | -0.0844     | -0.0706     | -0.0846       | 1.0000       |                |               |               |               |             |
| <i>October</i>  | 0.0023         | 0.0159      | -0.0932        | -0.0571     | -0.0934         | -0.1026      | -0.0935      | -0.0947    | -0.0880     | -0.0736     | -0.0882       | -0.0918      | 1.0000         |               |               |               |             |
| <i>Novem.</i>   | 0.0023         | 0.0065      | -0.0705        | -0.0058     | -0.0972         | -0.1068      | -0.0973      | -0.0985    | -0.0916     | -0.0766     | -0.0918       | -0.0955      | -0.0996        | 1.0000        |               |               |             |
| <i>Decem.</i>   | 0.0096         | 0.0164      | 0.0071         | -0.0328     | -0.0969         | -0.1064      | -0.0970      | -0.0982    | -0.0913     | -0.0763     | -0.0915       | -0.0952      | -0.0993        | -0.1033       | 1.0000        |               |             |
| <i>Female</i>   | 0.2251         | 0.3235      | -0.0004        | 0.2467      | 0.0003          | 0.0004       | 0.0002       | -0.0040    | -0.0041     | -0.0034     | -0.0027       | 0.0140       | -0.0015        | -0.0005       | 0.0002        | 1.0000        |             |
| <i>Male</i>     | 0.1519         | 0.1453      | -0.0120        | 0.2595      | -0.0002         | 0.0002       | -0.0001      | -0.0039    | -0.0036     | -0.0029     | -0.0037       | 0.0151       | 0.0004         | -0.0010       | -0.0001       | -0.3860       | 1.0000      |

**Table S2.** Correlation Coefficients Matrix for the Long-Run Dataset
